# Supplementary material for: A New Insight into Meloxicam: Assessment of Antioxidant and Anti-Glycating Activity in In Vitro Studies
Source: MDPI journal article supplement (doi:10.3390/ph13090240), 2020-09-10
Supplement: s1 [file s1]

### Fluorimetric method

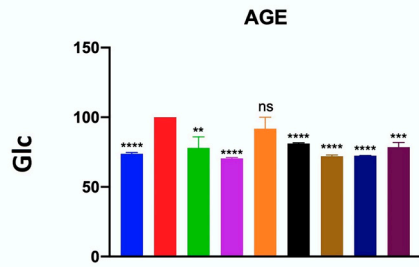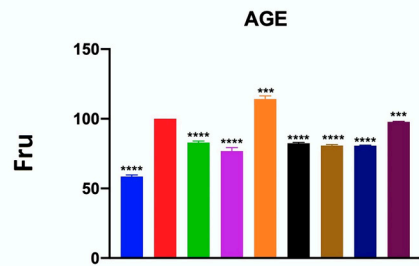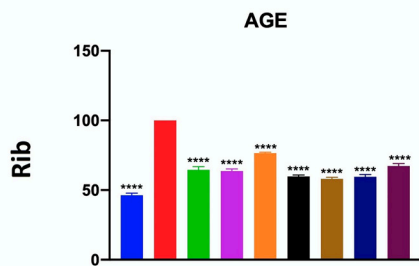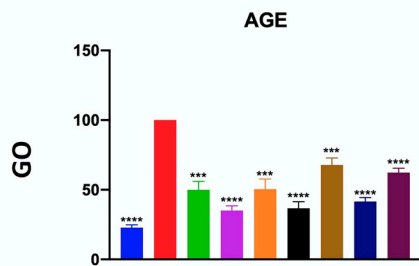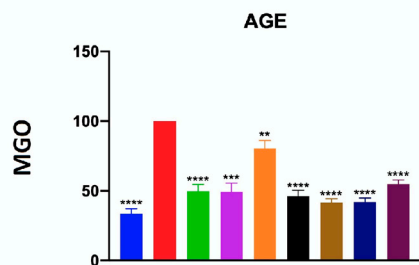

### ELISA method

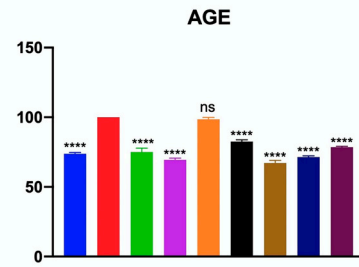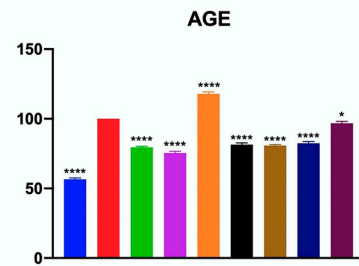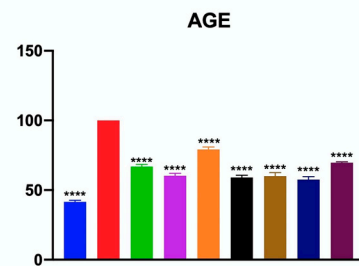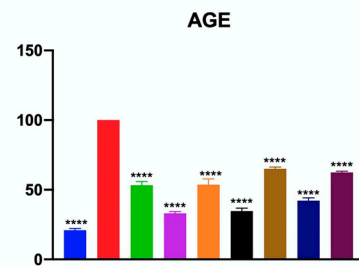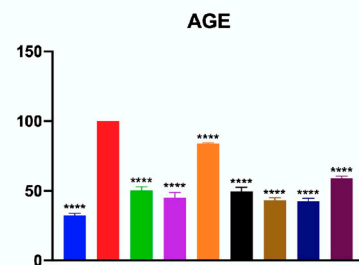

- BSA
- BSA + chloramine T
- BSA + chloramine T + meloxicam
- BSA + chloramine T + aminoguanidine
- BSA + chloramine T + metformin
- BSA + chloramine T + captopril
- BSA + chloramine T + trolox
- BSA + chloramine T + reduced glutathione
- BSA + chloramine T + lipoic acid

**Figure S1. Validation of results by the ELISA method.**

The effects of meloxicam, captopril, trolox, reduced glutathione, lipoic acid, aminoguanidine or metformin addition on the content of advanced glycation end products (AGE) measured by fluorimetric method and ELISA. AGE: advanced glycation end products; BSA: bovine serum albumin; Glc: glucose-induced glycation; Fru: fructose-induced glycation; Rib: ribose-induced glycation; GO: glyoxal-induced glycation; MG: methylglyoxal-induced glycation; chloramine T: chloramine T-induced oxidation; ns: not significant vs control (BSA + glycating agent); \*\*  $p < 0.01$  vs control; \*\*\*  $p < 0.001$  vs control; \*\*\*\*  $p < 0.0001$  vs control.
